# Supplementary material for: Which sample type is better for Xpert MTB/RIF to diagnose adult and pediatric pulmonary tuberculosis?
Source: PubMed Central journal article supplement (PMC7403955; doi:10.1042/bsr20200308), 2020-08-04
Supplement: BSR-2020-0308_supp.pdf [file BSR-2020-0308_supp.pdf]

**Supplementary Table 1** The results of subgroup analysis

| Subgroup                              | No. studies | Chi-squared | P value | Sensitivity (95% CI <sup>a</sup> ) | Specificity (95% CI) |
|---------------------------------------|-------------|-------------|---------|------------------------------------|----------------------|
| <b>Adults BAL <sup>b</sup> group</b>  |             |             |         |                                    |                      |
| Smear status                          |             |             |         |                                    |                      |
| Smear-positive                        | 3           | 0.10        | 0.950   | 95% (0.85-0.99)                    | 30% (0.02-0.79)      |
| Smear-negative                        | 4           | 5.21        | 0.157   | 75% (0.67-0.82)                    | 92% (0.90-0.94)      |
| HIV status                            |             |             |         |                                    |                      |
| HIV-positive                          | 3           | 0.10        | 0.950   | 79% (0.66-0.89)                    | 88% (0.79-0.94)      |
| Specimen procession                   |             |             |         |                                    |                      |
| Yes                                   | 10          | 29.21       | 0.001   | 86% (0.83-0.90)                    | 88% (0.86-0.90)      |
| <b>Adults ES <sup>c</sup> group</b>   |             |             |         |                                    |                      |
| Smear status                          |             |             |         |                                    |                      |
| Smear-positive                        | 3           | 2.02        | 0.365   | 97% (0.92-0.99)                    | 25% (0.08-0.51)      |
| Smear-negative                        | 4           | 7.88        | 0.049   | 80% (0.74-0.86)                    | 100% (0.98-1.00)     |
| HIV status                            |             |             |         |                                    |                      |
| HIV-positive                          | 2           | 2.18        | 0.140   | 92% (0.86-0.96)                    | 81% (0.71-0.89)      |
| HIV-negative                          | 2           | 0.26        | 0.878   | 93% (0.87-0.97)                    | 96% (0.93-0.98)      |
| Specimen procession                   |             |             |         |                                    |                      |
| Yes                                   | 10          | 47.33       | 0       | 90% (0.88-0.92)                    | 98% (0.98-1.00)      |
| <b>Adults IS <sup>d</sup> group</b>   |             |             |         |                                    |                      |
| Smear status                          |             |             |         |                                    |                      |
| Smear-positive                        | 4           | 0.75        | 0.861   | 98% (0.60-0.99)                    | 71% (0.50-0.88)      |
| Smear-negative                        | 4           | 16.59       | 0.001   | 67% (0.60-0.73)                    | 95% (0.94-0.96)      |
| HIV status                            |             |             |         |                                    |                      |
| HIV-positive                          | 3           | 10.86       | 0.004   | 88% (0.84-0.91)                    | 96% (0.94-0.97)      |
| HIV-negative                          | 3           | 4.32        | 0.115   | 88% (0.82-0.92)                    | 95% (0.93-0.97)      |
| Specimen procession                   |             |             |         |                                    |                      |
| Yes                                   | 7           | 18.95       | 0.004   | 86% (0.84-0.89)                    | 97% (0.96-0.98)      |
| <b>Children GA <sup>e</sup> group</b> |             |             |         |                                    |                      |
| Smear status                          |             |             |         |                                    |                      |
| Smear- negative                       | 3           | 37.89       | 0.000   | 71% (0.59-0.81)                    | 94% (0.93-0.95)      |
| Specimen procession                   |             |             |         |                                    |                      |
| Yes                                   | 5           | 45.29       | 0.000   | 79% (0.71-0.86)                    | 94% (0.93-0.94)      |
| <b>Children IS group</b>              |             |             |         |                                    |                      |
| Smear status                          |             |             |         |                                    |                      |
| Smear-positive                        | 4           | 0.37        | 0.946   | 96% (0.89-0.99)                    | 56% (0.11-0.94)      |
| Smear-negative                        | 5           | 3.91        | 0.419   | 65% (0.58-0.72)                    | 98% (0.97-0.99)      |
| HIV status                            |             |             |         |                                    |                      |
| HIV-positive                          | 4           | 7.08        | 0.07    | 88% (0.74-0.96)                    | 98% (0.96-0.99)      |
| HIV-negative                          | 4           | 0.87        | 0.833   | 69% (0.61-0.77)                    | 98% (0.97-0.99)      |
| Specimen procession                   |             |             |         |                                    |                      |
| Yes                                   | 8           | 6.83        | 0.446   | 67% (0.61-0.72)                    | 99% (0.98-0.99)      |

a: confidence interval; b: bronchoalveolar lavage; c: expectorated sputum; d: induced sputum; e: gastric aspiration
